# Supplementary material for: A Longitudinal Study Examining the Change in Functional Independence Over Time in Elderly Individuals With a Functioning Kidney Transplant
Source: PubMed Central journal article supplement — Can J Kidney Health Dis. 2018 Jun 1;5:2054358118775099. doi: 10.1177/2054358118775099 (PMC5985553; doi:10.1177/2054358118775099), 2018-06-01
Supplement: 2017_Suppl_1yr_transplant_yau_r1_Table_2.pdf [file 2017_Suppl_1yr_transplant_yau_r1_Table_2.pdf]

## VERSION 2

**Table 2:** Characteristics of participants with baseline disability who demonstrated further functional decline over the one year period, versus those who remained stable or improved

|                                                                      | <b>Progressive<br/>Functional<br/>Decline<br/>(n = 11)</b> | <b>Functional<br/>Stability or<br/>Improvement<br/>(n = 21)</b> | <b>P Value</b> |
|----------------------------------------------------------------------|------------------------------------------------------------|-----------------------------------------------------------------|----------------|
| Age at follow-up<br>(mean $\pm$ SD)                                  | 72.0 $\pm$ 5.8                                             | 71.2 $\pm$ 4.6                                                  | 0.87           |
| Male (%)                                                             | 8/11 (73%)                                                 | 13/21 (62%)                                                     | 0.54           |
| Time since transplant<br>(yrs) (median, IQR)                         | 6.9 (2.5,8.9)                                              | 3.8 (2.0,7.7)                                                   | 0.12           |
| No. of comorbidities<br>at baseline (median,<br>IQR)                 | 4.7 (3,6)                                                  | 3.0 (2,5)                                                       | 0.79           |
| TUG >15s at baseline<br>(%)                                          | 6/10 (60%)                                                 | 5/20 (25%)                                                      | 0.06           |
| Dominant handgrip<br><10 <sup>th</sup> percentile at<br>baseline (%) | 6/11 (55%)                                                 | 9/21 (43%)                                                      | 0.40           |
| Median disabled<br>ADLs at baseline<br>(IQR)                         | 3 (1,5)                                                    | 2 (1,4)                                                         | 1.00           |
| No disability in<br>instrumental ADLs at<br>baseline (%)             | 8/11 (73%)                                                 | 16/21 (76%)                                                     | 0.51           |
| Fall during year of<br>follow-up (%)                                 | 6/11 (55%)                                                 | 3/21 (14%)                                                      | 0.02           |
| Hospitalized during<br>year of follow-up (%)                         | 2/11 (18%)                                                 | 9/21 (43%)                                                      | 0.45           |
