# Supplementary material for: A Longitudinal Study Examining the Change in Functional Independence Over Time in Elderly Individuals With a Functioning Kidney Transplant
Source: PubMed Central journal article supplement — Can J Kidney Health Dis. 2018 Jun 1;5:2054358118775099. doi: 10.1177/2054358118775099 (PMC5985553; doi:10.1177/2054358118775099), 2018-06-01
Supplement: 2017_Suppl_2_Assessment_Tools.pdf [file 2017_Suppl_2_Assessment_Tools.pdf]

## **Supplement 2:**

### **Assessment Tools used in study methods**

All functional assessments were conducted by one of two trained assessors (JF, GK) using a standardized protocol. Patients were interviewed to ascertain current living situation, employment status, and one-year fall history. Functional assessments were performed in a quiet environment under standard conditions, and included the Barthel Index (1), the Lawton-Brody Scale of Instrumental Activities of Daily Living (2), the timed up-and-go (TUG) test (3), and dynamometer handgrip strength (4, 5).

#### *The Barthel ADL Index*

Independence in 10 core basic activities of daily living (BADL) was measured using the Barthel ADL Index(1). This measure is one of the most widely used assessments of functional disability among the elderly in both clinical and research contexts, and has been widely used in both renal and non-renal populations(6, 7). Individuals who identified a need for supervision with a task (e.g. getting in-and-out of the bath tub) or verbal cueing (e.g. when dressing) were defined as not independent.

#### *Instrumental Activities of Daily Living (IADLs)*

IADLs were measured using the Lawton-Brody IADL Scale(2). This measure is well validated and previously used in the elderly dialysis population(6, 7). Subjects who needed supervision or assistance with or were unable to complete the task were defined as “dependent” for the given function.

#### *Hand Grip Strength*

Hand grip is a measure of upper-limb muscle strength and has been shown to predict subsequent functional decline(4). Patients were tested using a Jamar handgrip dynamometer (Sammons Preston Inc, Bolingbrook, IL), with a single maximal effort squeeze to the dynamometer grip. Handgrip strength was measured in kilograms. Readings were obtained for both hands, starting with the dominant hand and proceeding to the non-dominant hand.

### *Timed Up and Go Test*

Lower-limb strength and balance were measured using a test of functional mobility, the Timed Up and Go (TUG) test(8, 9). The TUG test was performed once and completion of the task was timed, in seconds, from the time the maneuver was started until the patient was re-seated. Longer test times (TUG time > 10 seconds) predict the future need for placement in a long-term care facility(3, 10, 11). Norms for the kidney transplant population have not been published.

### **References**

1. Mahoney FI, Barthel DW: Functional Evaluation: The Barthel Index. *Md State Med J*, 14: 61-65, 1965
2. Lawton MP, Brody EM: Assessment of older people: self-maintaining and instrumental activities of daily living. *Gerontologist*, 9: 179-186, 1969
3. Steffen TM, Hacker TA, Mollinger L: Age- and gender-related test performance in community-dwelling elderly people: Six-Minute Walk Test, Berg Balance Scale, Timed Up & Go Test, and gait speeds. *Phys Ther*, 82: 128-137, 2002
4. Massy-Westropp NM, Gill TK, Taylor AW, Bohannon RW, Hill CL: Hand Grip Strength: age and gender stratified normative data in a population-based study. *BMC Res Notes*, 4: 127, 2011
5. Silva LF, Matos CM, Lopes GB, Martins MT, Martins MS, Arias LU, Pisoni RL, Lopes AA: Handgrip strength as a simple indicator of possible malnutrition and inflammation in men and women on maintenance hemodialysis. *J Ren Nutr*, 21: 235-245, 2011
6. Cook WL, Jassal SV: Functional dependencies among the elderly on hemodialysis. *Kidney Int*, 73: 1289-1295, 2008
7. Cook WL, Tomlinson G, Donaldson M, Markowitz SN, Naglie G, Sobolev B, Jassal SV: Falls and fall-related injuries in older dialysis patients. *Clin J Am Soc Nephrol*, 1: 1197-1204, 2006
8. Podsiadlo D, Richardson S: The timed "Up & Go": a test of basic functional mobility for frail elderly persons. *J Am Geriatr Soc*, 39: 142-148, 1991
9. Kristensen MT, Henriksen S, Stie SB, Bandholm T: Relative and absolute intertester reliability of the timed up and go test to quantify functional mobility in patients with hip fracture. *J Am Geriatr Soc*, 59: 565-567, 2011
10. Gill TM, Allore HG, Gahbauer EA, Murphy TE: Change in disability after hospitalization or restricted activity in older persons. *JAMA*, 304: 1919-1928, 2010
11. Gill TM, Allore HG, Holford TR, Guo Z: Hospitalization, restricted activity, and the development of disability among older persons. *JAMA*, 292: 2115-2124, 2004
